# Supplementary material for: A Novel Splice Variant of the Inhibitor of Growth 3 Lacks the Plant Homeodomain and Regulates Epithelial–Mesenchymal Transition in Prostate Cancer Cells
Source: MDPI journal article supplement (doi:10.3390/biom11081152), 2021-08-04
Supplement: s1 [file s1]

A

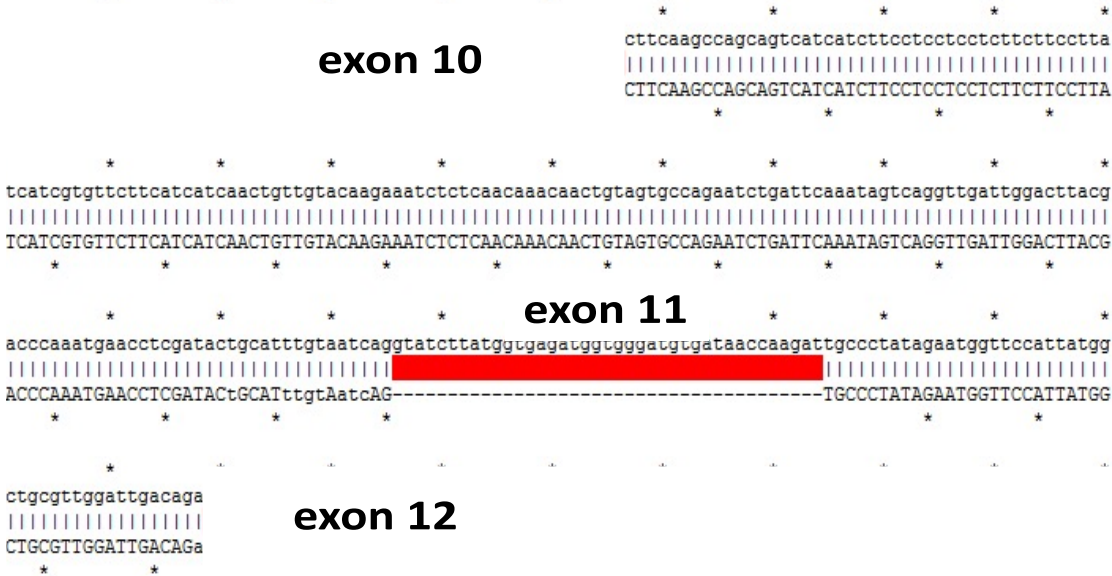

B

|           |                                                 |
|-----------|-------------------------------------------------|
| ING1      | YCLCNQVSYGEMIGCDNDECPIEFWFHFSCVGLN HKPKGKWYCPKC |
| ING2      | YCLCNQVSYGEMIGCDNEQCPIEFWFHFSCVSLTYKPKGKWYCPKC  |
| ING3 FL   | YCICNQVSYGEMVGC DNQDCPIEFWFHYGCVGLTEAPKGKWYCPQC |
| ING3Δex11 | YCICNQ-----CPIEFWFHYGCVGLTEAPKGKWYCPQC          |
| ING4      | YCLCHQVSYGEMIGCDNPDCSIEFWHFACVGLTTKPRGKWFCPRC   |
| ING5      | YCLCHQVSYGEMIGCDNPDCPIEFWFHFACVDLTTKPKGKWFCPRC  |

Supplementary Figure S1. Sequence of in frame deletion of exon11 results in partial deletion of the PHD of ING3.

- A) Sequence of exon 10-12 junction of full-length and ING3Δex11 splice variant. The deletion is highlighted in red.
- B) Comparison of the PHD of ING1-5 with the ING3Δex11 splice variant indicating an in frame deletion within the PHD.

Fig. 1S

## Supplement

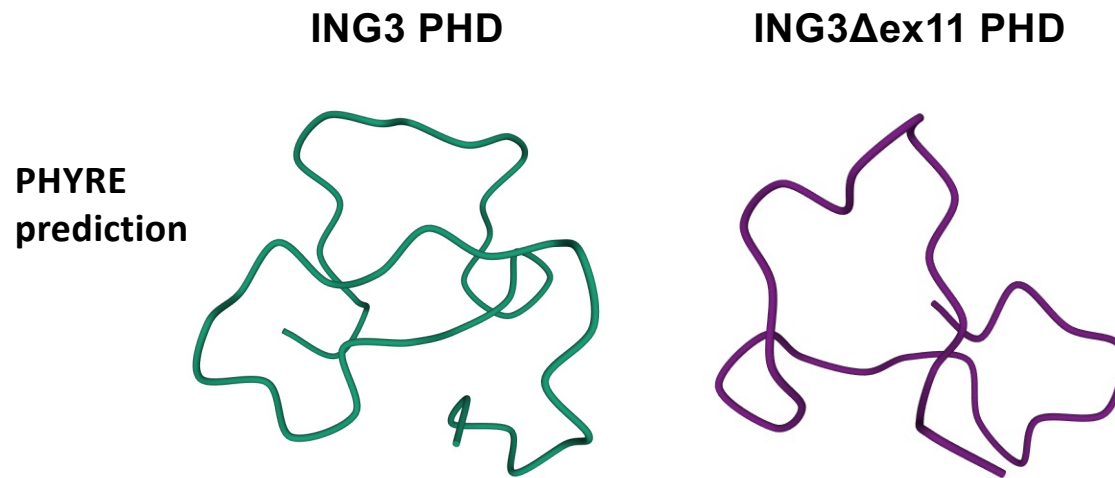

**Supplementary Figure S2.** Structure prediction using PHYRE software of the PHD of full-length ING3 and the remaining amino acids of the PHD sequence of the ING3 $\Delta$ ex11 splice variant.

Fig. S2

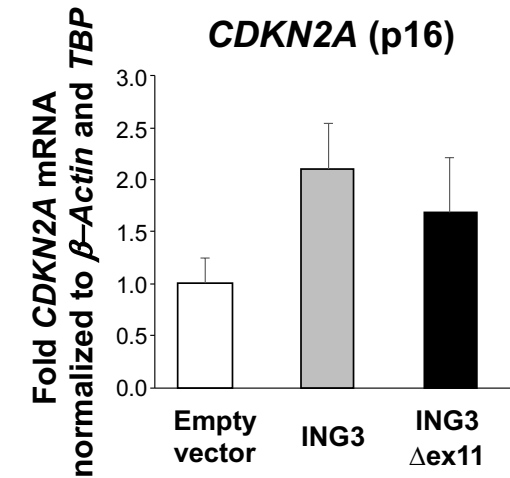

**Supplementary Figure S3.** CDKN2A expression is induced by ING3 and ING3 $\Delta$ Ex11.

qRT-PCR from mRNA isolated from transfected LNCaP cells detecting the expression of CDKN2B encoding for the cell cycle inhibitor p16. Results of two independent experiments with each two replicates are shown. Values are normalized to the endogenous expression of the house-keeping genes  $\beta$ -Actin and TBP.

Fig. S3
